# Supplementary material for: The enhancement of enzymatic hydrolysis of lignocellulosic substrates by the addition of accessory enzymes such as xylanase: is it an additive or synergistic effect?
Source: Springer Nature journal article supplement (doi:10.1186/1754-6834-4-36), 2011-10-05

Improvement in cellulose hydrolysis

40%  
30%  
20%  
10%  
0%

Xylanase

BSA

SPCS

SPSB

SPLP

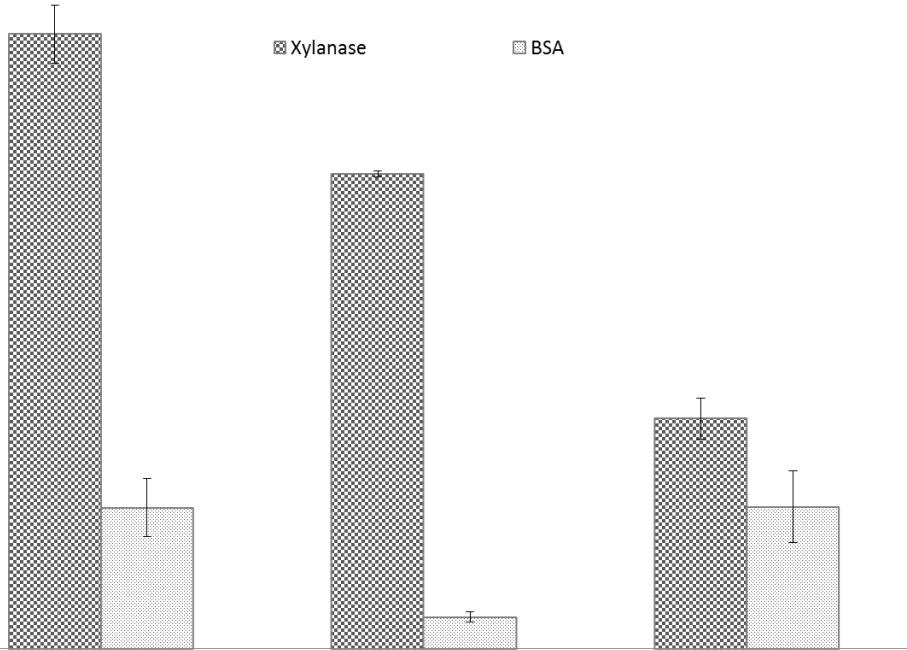

Supplement: 13068_2011_112_MOESM4_ESM.pdf [file 13068_2011_112_MOESM4_ESM.pdf]
